# Supplementary material for: Solvatochromic behaviour of new donor–acceptor oligothiophenes
Source: Royal Society of Chemistry journal article supplement (doi:10.1039/d1nj01715b), 2021-01-01
Supplement: d1nj01715b1.pdf [file d1nj01715b1.pdf]

## Solvatochromic behaviour of new donor-acceptor oligothiophenes

### Electronic Supplementary Information

Francesca D'Anna<sup>a\*</sup>, Fabiana Pandolfi<sup>b</sup>, Daniele Rocco<sup>b</sup>, Salvatore Marullo<sup>a</sup>, Marta Feroci<sup>b</sup>, and Leonardo Mattiello<sup>b\*</sup>

<sup>a</sup>Università degli Studi di Palermo, Dipartimento di Scienze e Tecnologie Biologiche Chimiche e Farmaceutiche, Viale delle Scienze, Ed. 17, 90128, Palermo (Italia). E-mail: francesca.danna@unipa.it

<sup>b</sup>Sapienza Università di Roma, Dipartimento di Scienze di Base e Applicate per l'Ingegneria, Via del Castro Laurenziano 7, 00161, Roma (Italia). E-mail: leonardo.mattiello@uniroma1.it

#### Table of Contents

|                                                                                                               |       |
|---------------------------------------------------------------------------------------------------------------|-------|
| Overlapped UV-vis spectra for oligothiophenes in different solvents                                           | p. 2  |
| Plots of $\lambda_{\text{abs}}$ as a function of $E_{\text{T}}(30)$ for oligothiophenes in different solvents | p. 7  |
| Overlapped emission spectra for oligothiophenes in different solvents                                         | p. 10 |
| Plots of $\lambda_{\text{em}}$ as a function of $E_{\text{T}}(30)$ for oligothiophenes in different solvents  | p. 15 |
| Lippert-Mataga equation plots for different oligothiophenes                                                   | p. 18 |
| Slopes (s) of the linear correlation obtained by the Lippert-Mataga equation                                  | p. 21 |

## Overlapped UV-vis spectra for oligothiophenes in different solvents

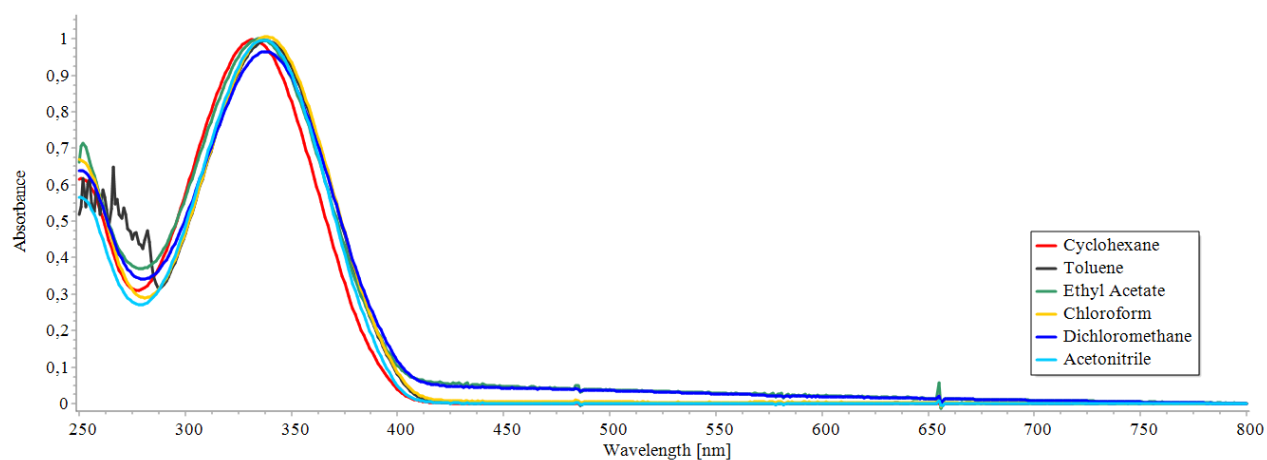

**Figure A1.** Overlapped UV-vis spectra of compound **T2T** in different solvents

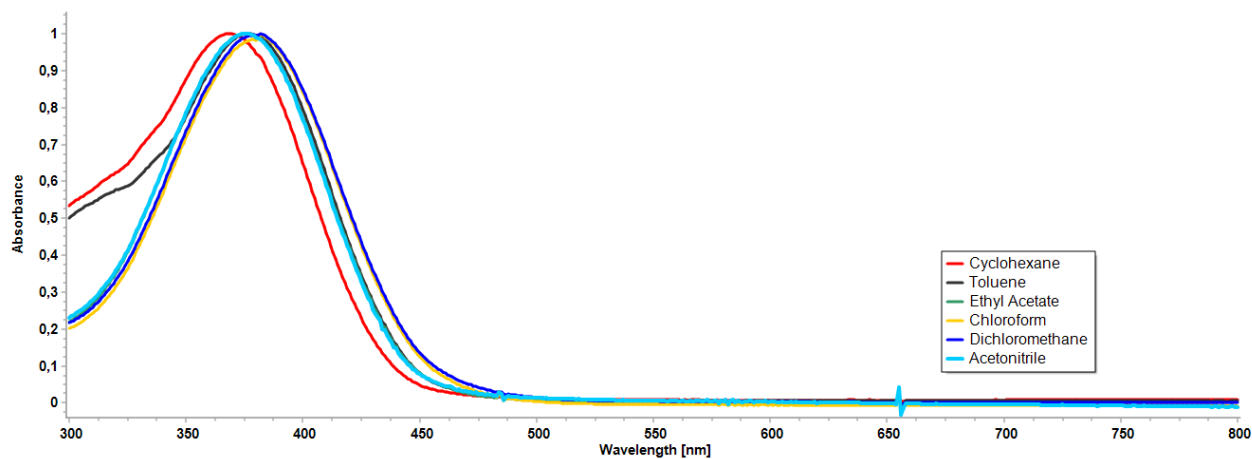

**Figure A2.** Overlapped UV-vis spectra of compound **BT2T** in different solvents

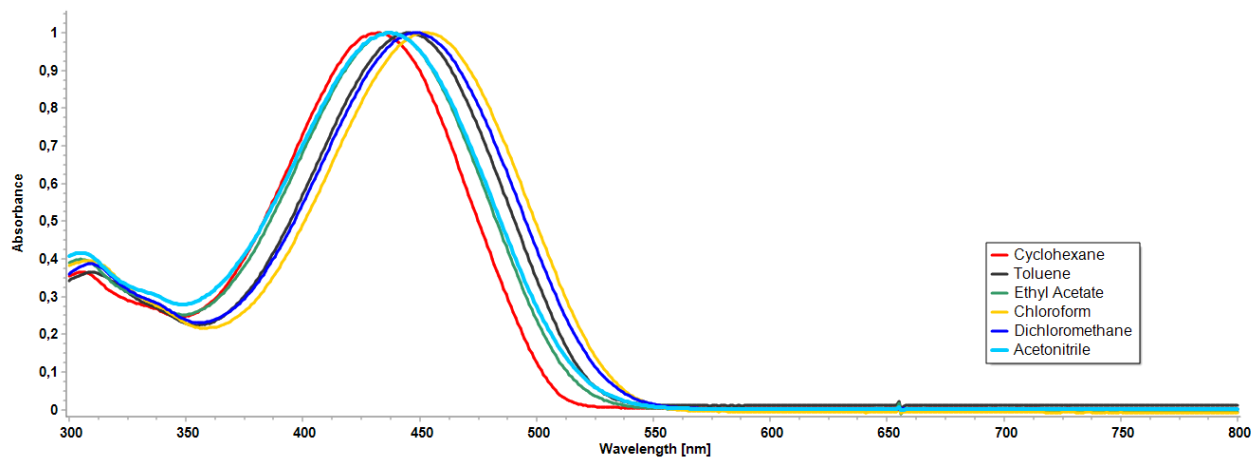

**Figure A3.** Overlapped UV-vis spectra of compound **T1N** in different solvents

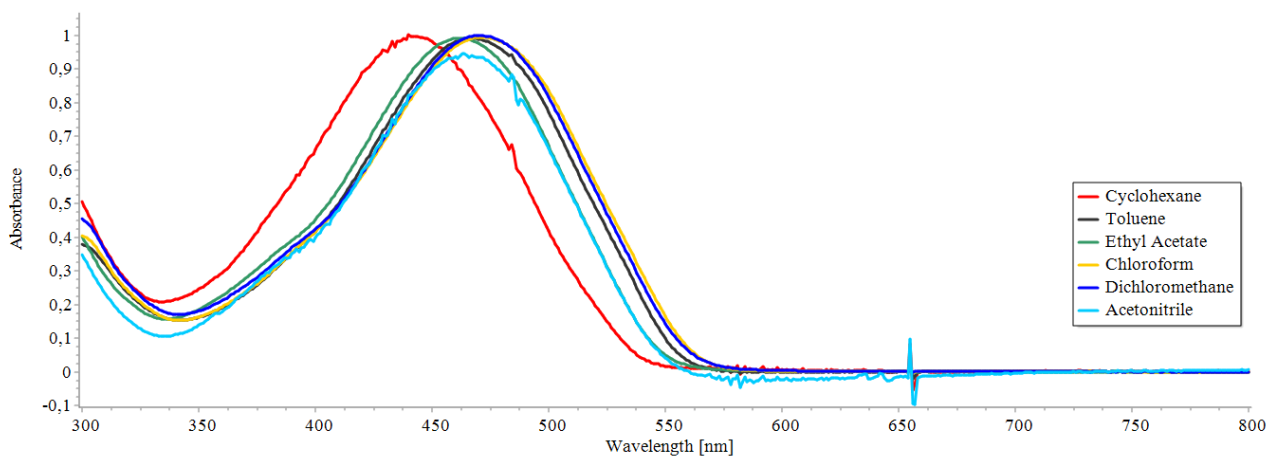

**Figure A4.** Overlapped UV-vis spectra of compound **T2N** in different solvents

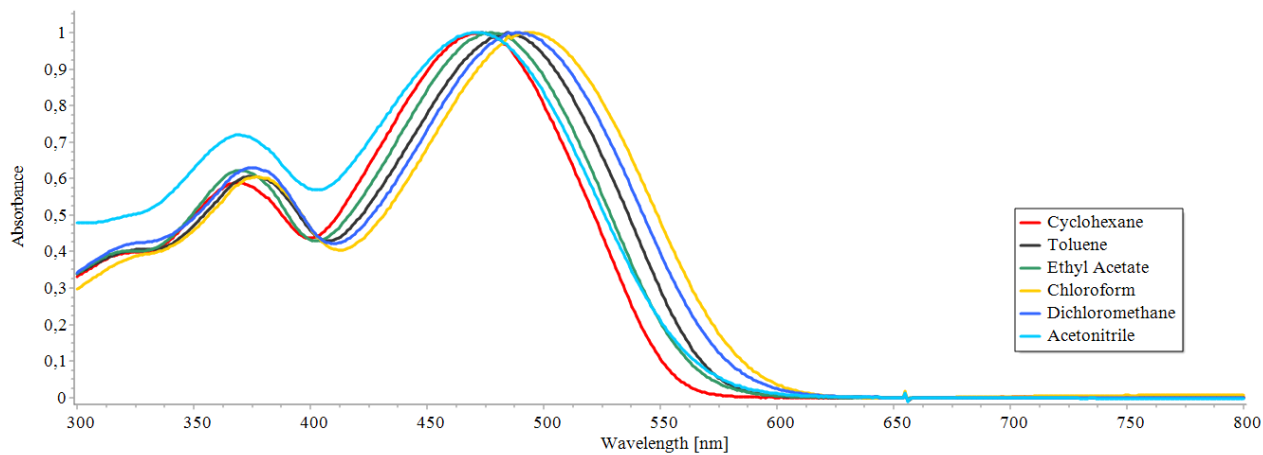

**Figure A5.** Overlapped UV-vis spectra of compound **BT1C** in different solvents

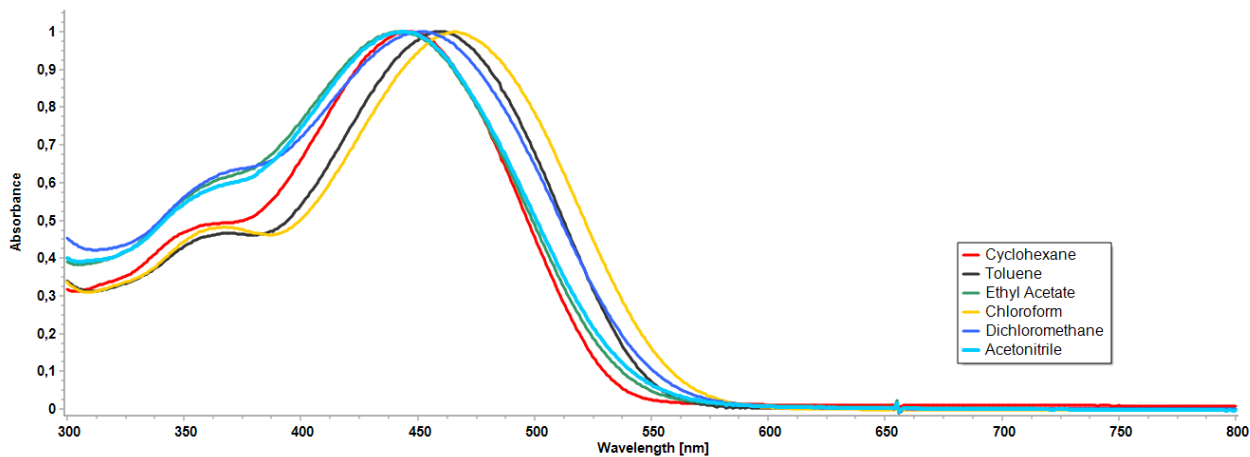

**Figure A6.** Overlapped UV-vis spectra of compound **BT1N** in different solvents

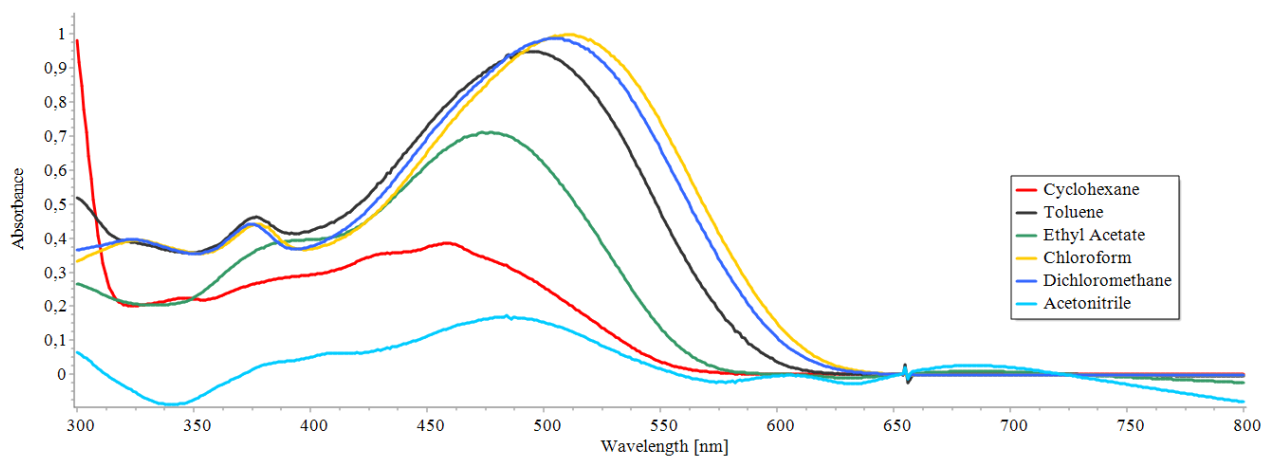

**Figure A7.** Overlapped UV-vis spectra of compound **BT2C** in different solvents

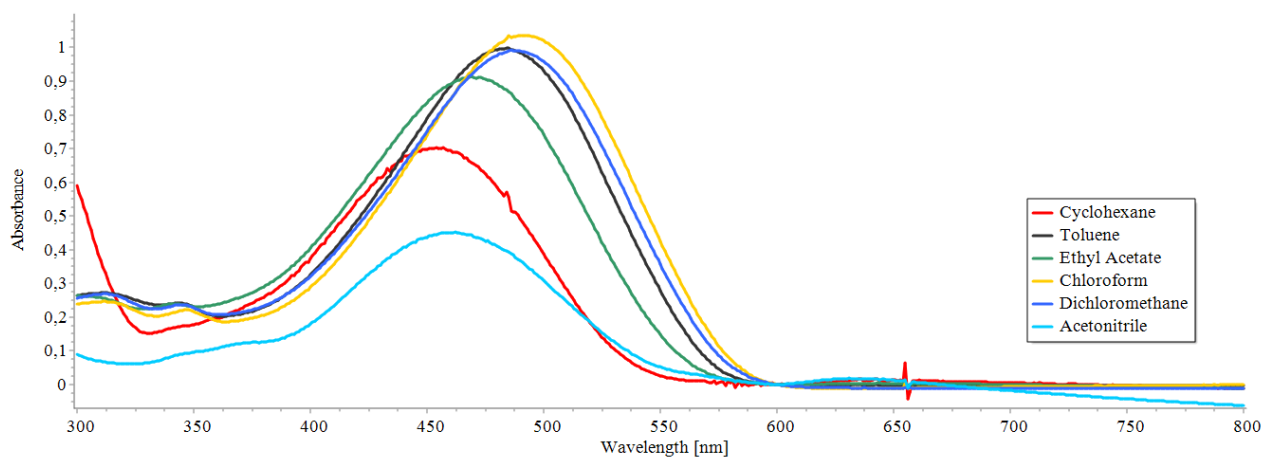

**Figure A8.** Overlapped UV-vis spectra of compound **BT2N** in different solvents

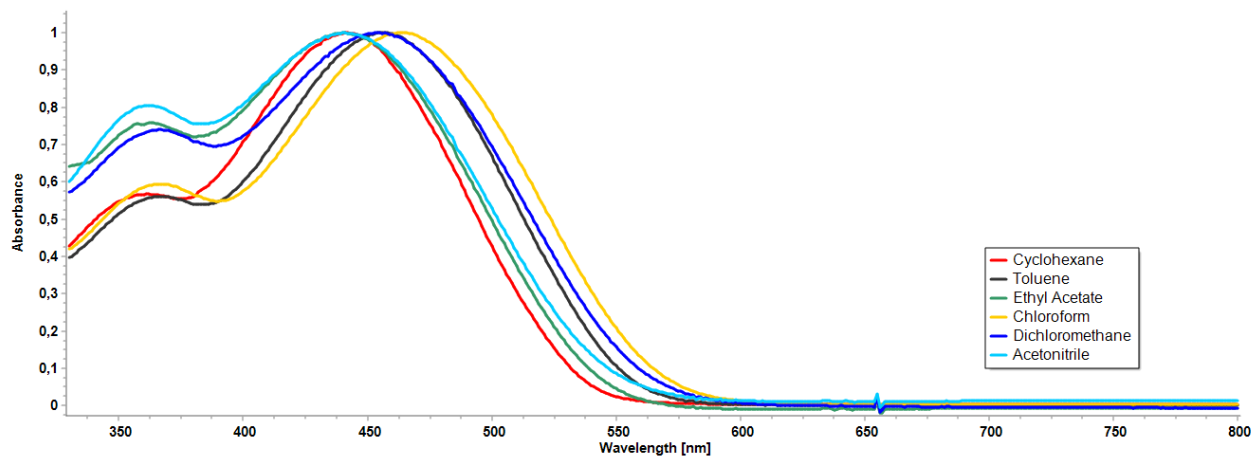

**Figure A9.** Overlapped UV-vis spectra of compound **BTTN** in different solvents

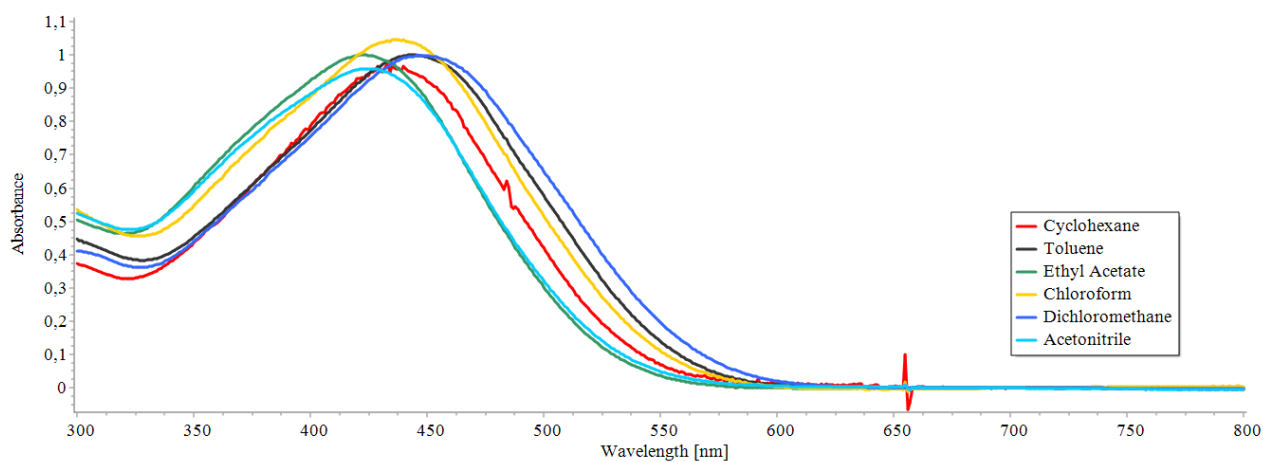

**Figure A10.** Overlapped UV-vis spectra of compound **BT4N** in different solvents

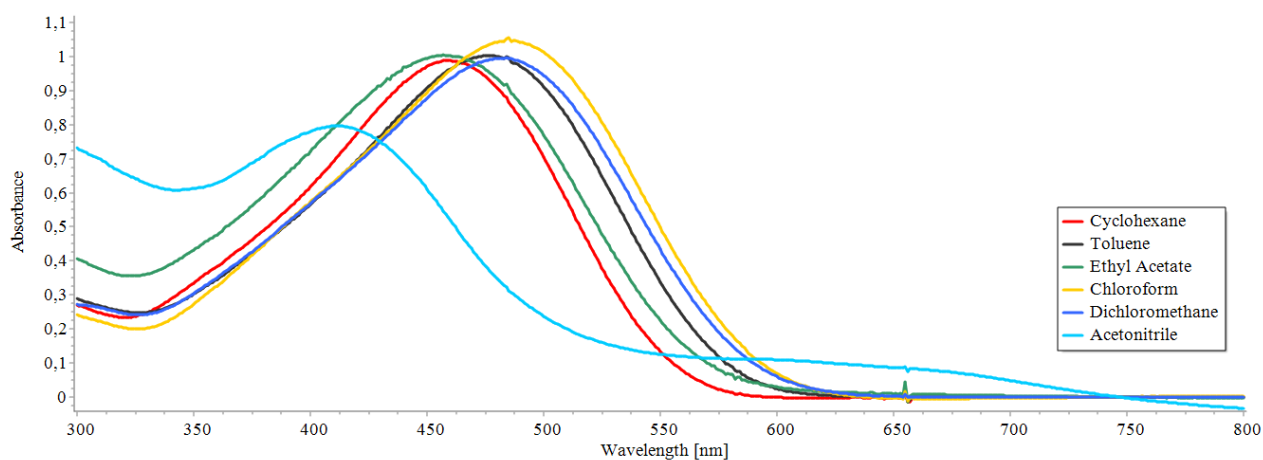

**Figure A11.** Overlapped UV-vis spectra of compound **BT6N** in different solvents

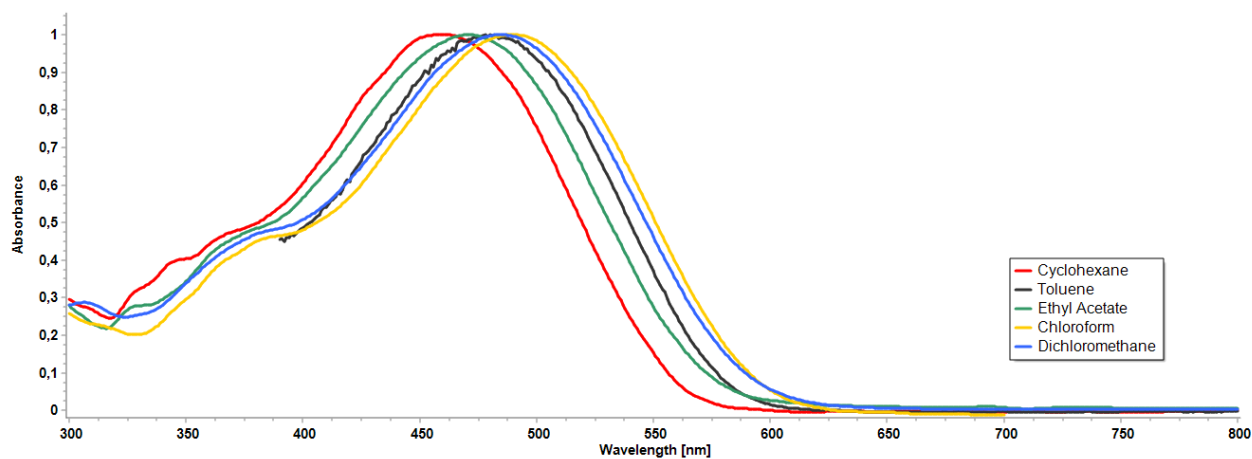

**Figure A12.** Overlapped UV-vis spectra of compound **D6N** in different solvents

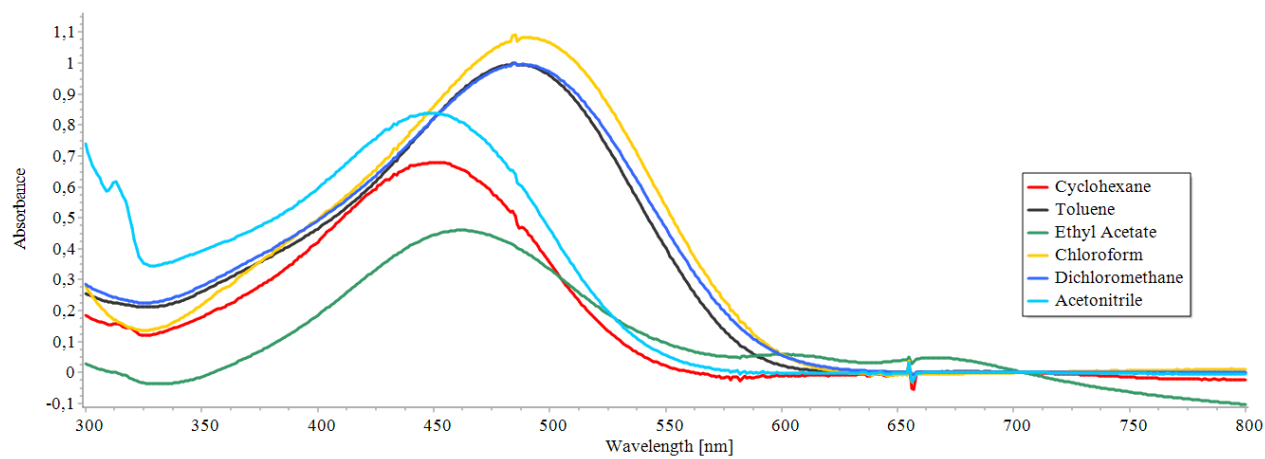

**Figure A13.** Overlapped UV-vis spectra of compound **D8N** in different solvents

Plots of  $\lambda_{\text{abs}}$  as a function of  $E_{\text{T}}(30)$  for oligothiophenes in different solvents

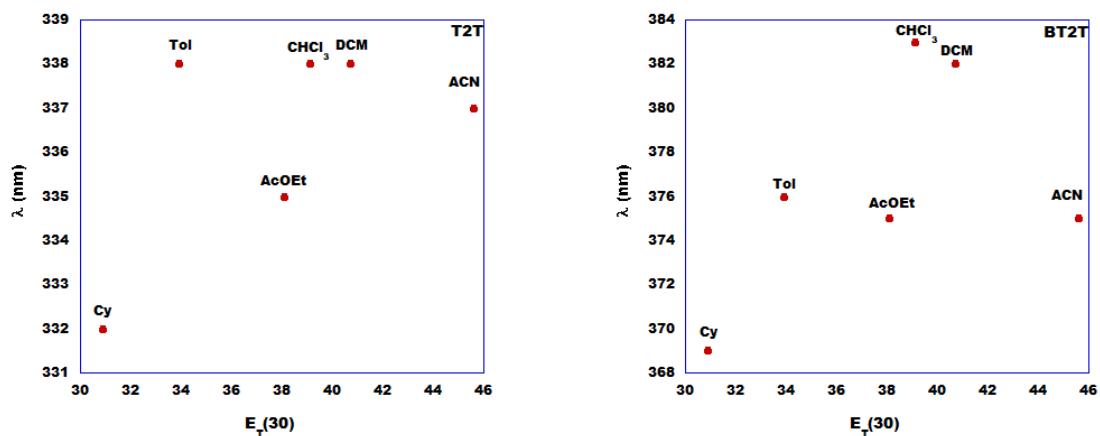

Figure A14. Plots of  $\lambda_{\text{abs}}$  as a function of  $E_{\text{T}}(30)$  for **T2T** and **BT2T**

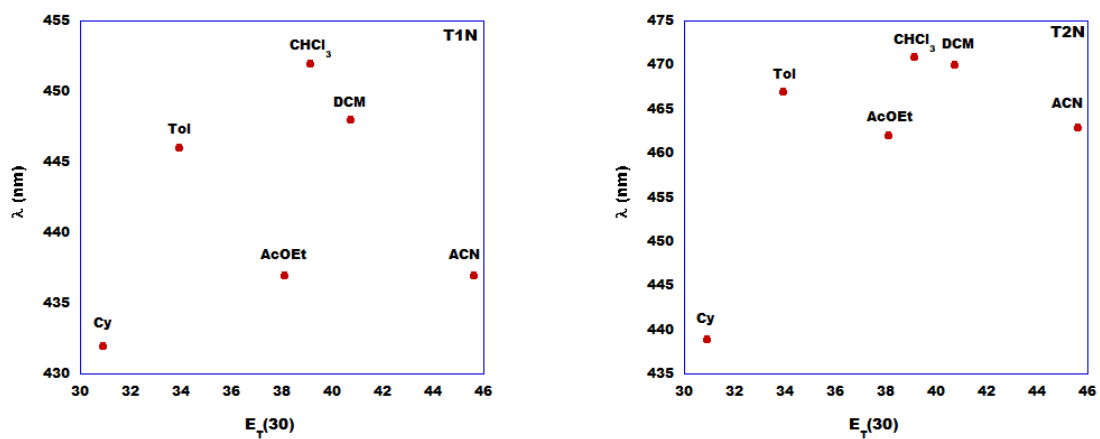

Figure A15. Plots of  $\lambda_{\text{abs}}$  as a function of  $E_{\text{T}}(30)$  for **T1N** and **T2N**

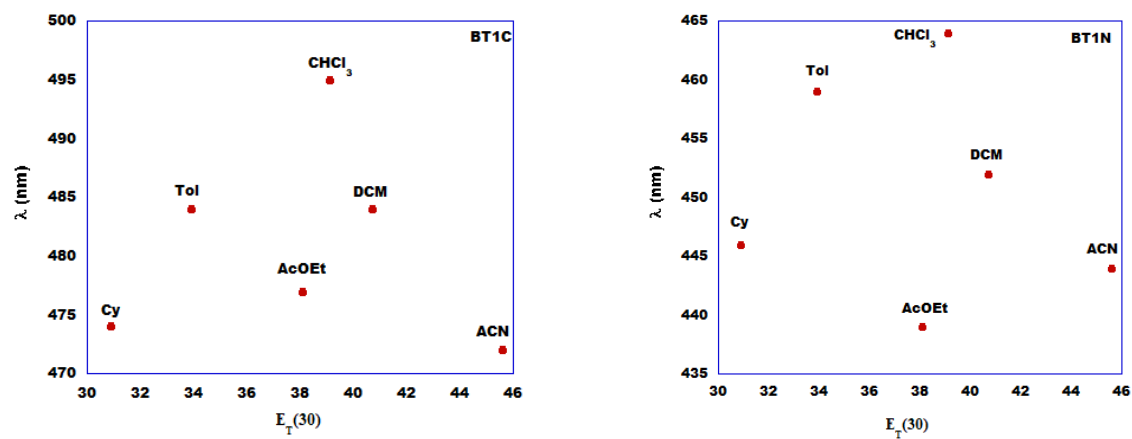

Figure A16. Plots of  $\lambda_{\text{abs}}$  as a function of  $E_{\text{T}}(30)$  for **BT1C** and **BT1N**

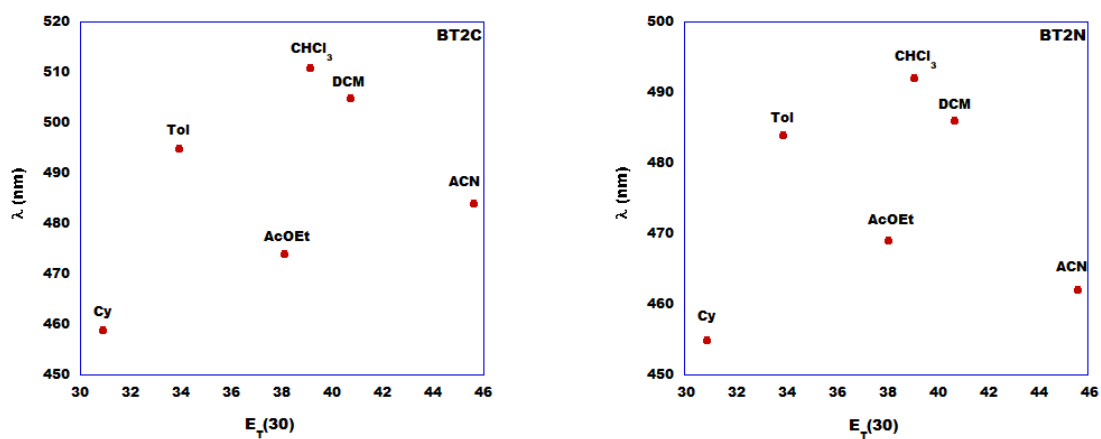

Figure A17. Plots of  $\lambda_{abs}$  as a function of  $E_T(30)$  for BT2C and BT2N

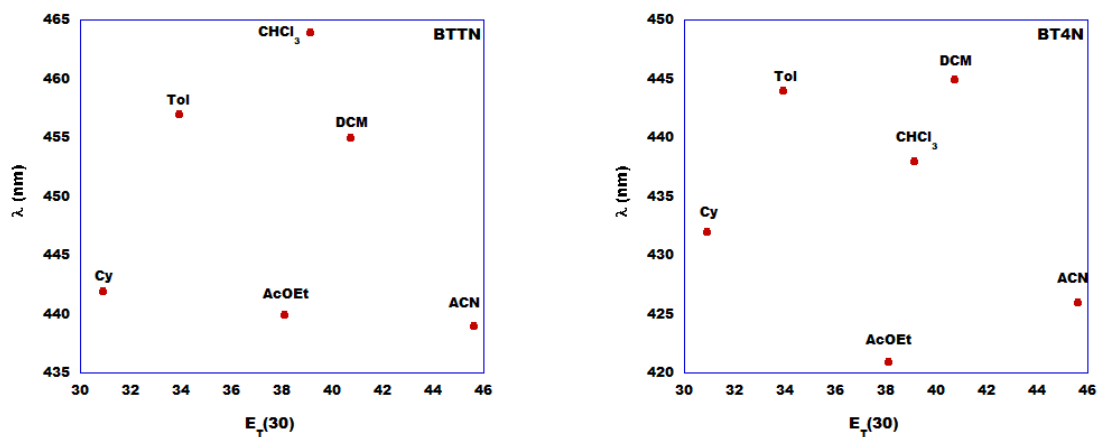

Figure A18. Plots of  $\lambda_{abs}$  as a function of  $E_T(30)$  for BTTN and BT4N

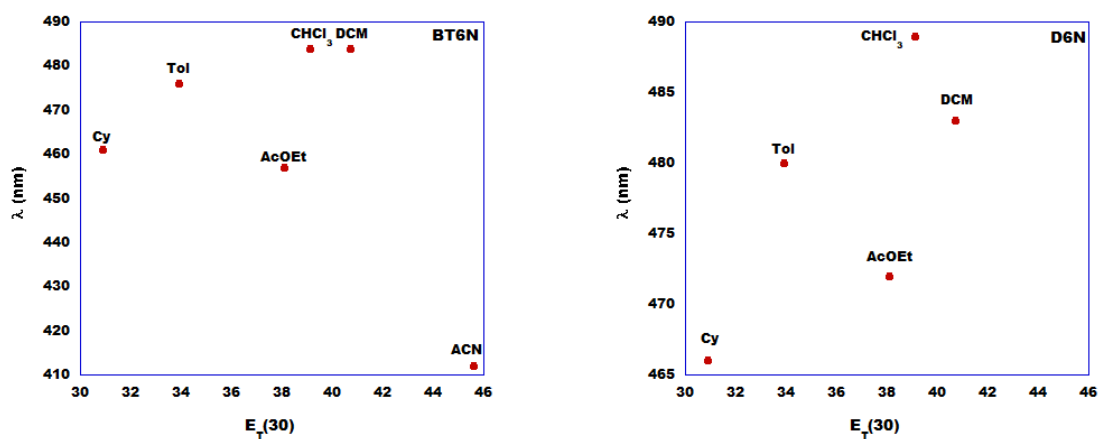

Figure A19. Plots of  $\lambda_{abs}$  as a function of  $E_T(30)$  for BT6N and D6N



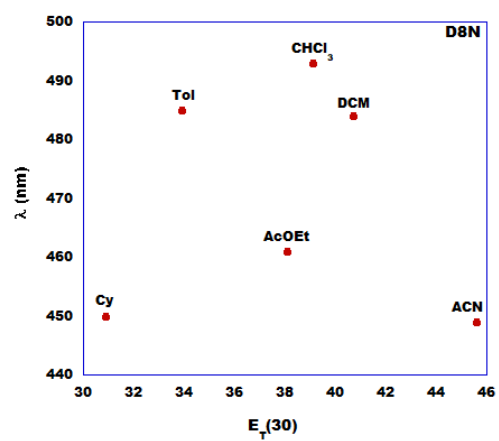

**Figure A20.** Plot of  $\lambda_{\text{abs}}$  as a function of  $E_T(30)$  for **D8N**

## Overlapped emission spectra for oligothiophenes in different solvents

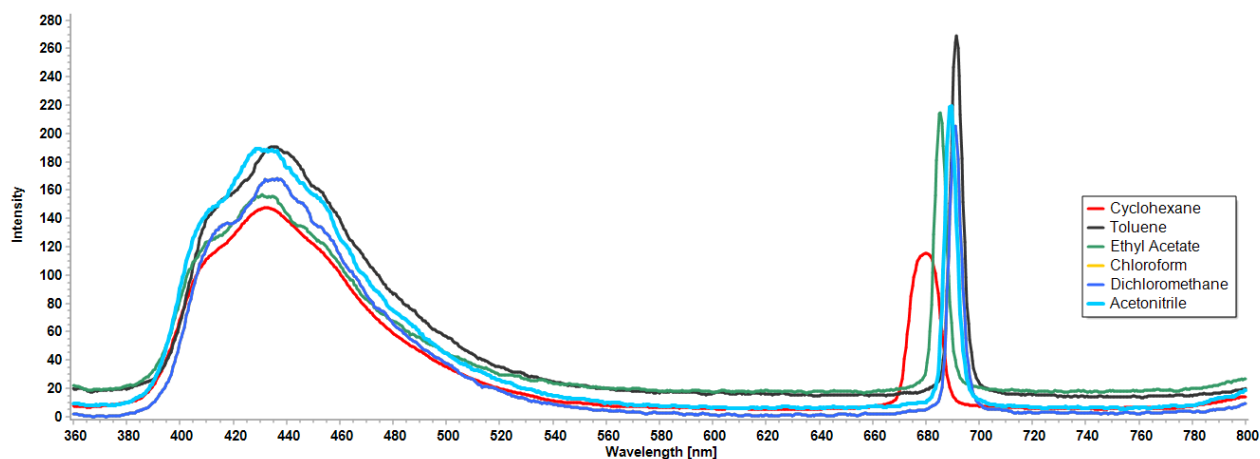

Figure A21. Overlapped emission spectra of compound T2T in different solvents.

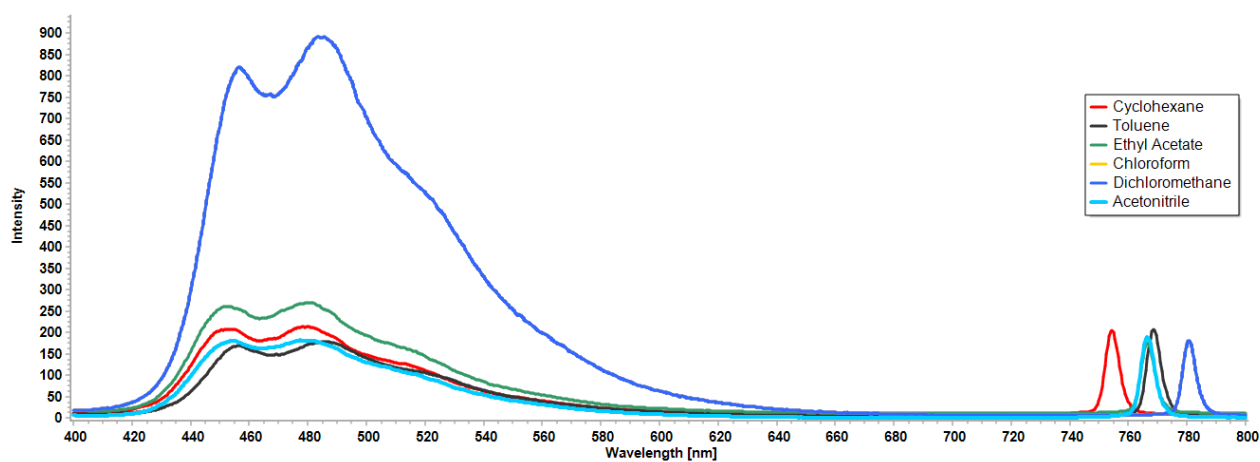

Figure A22. Overlapped emission spectra of compound BT2T in different solvents.

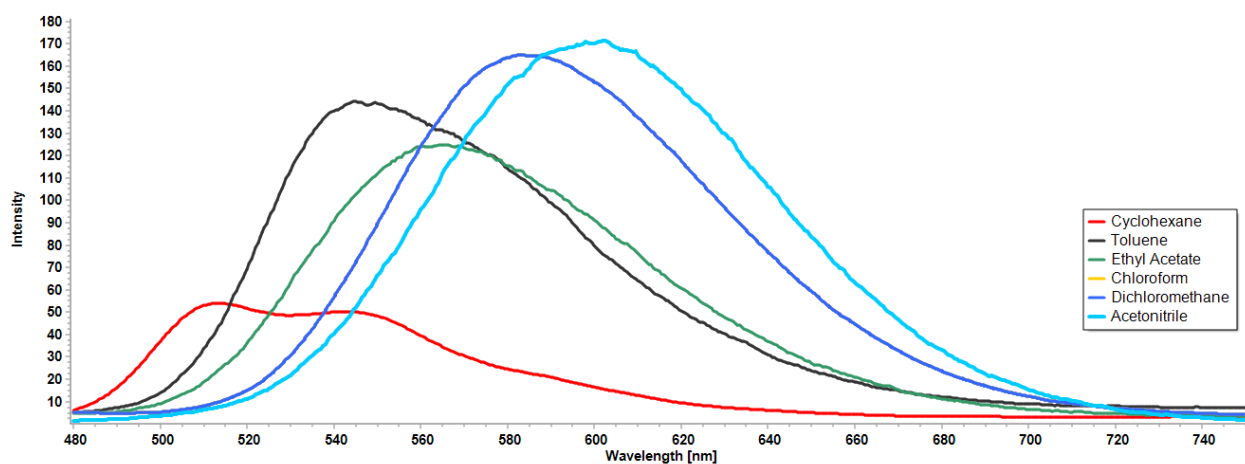

Figure A23. Overlapped emission spectra of compound T1N in different solvents.

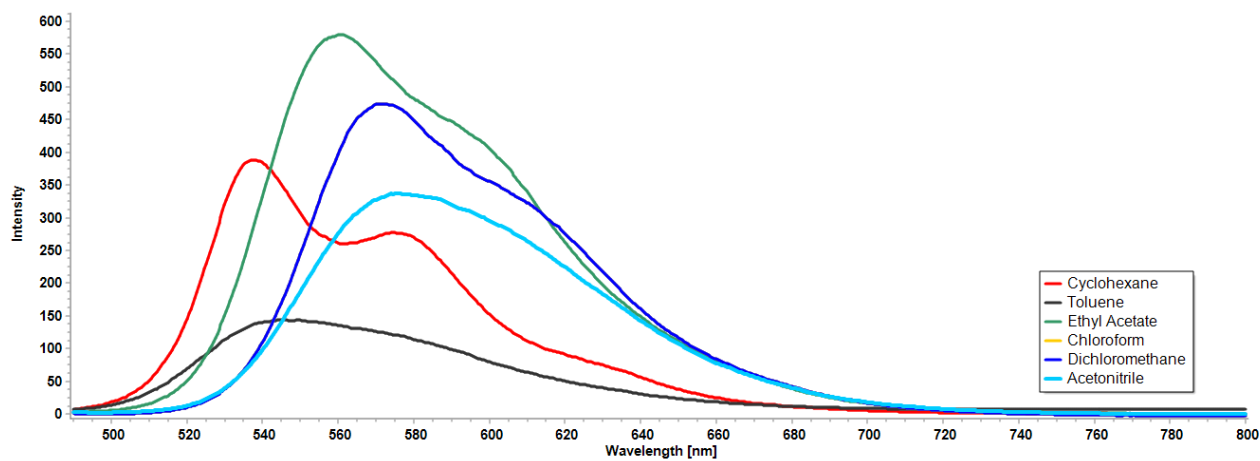

**Figure A24.** Overlapped emission spectra of compound **T2N** in different solvents.

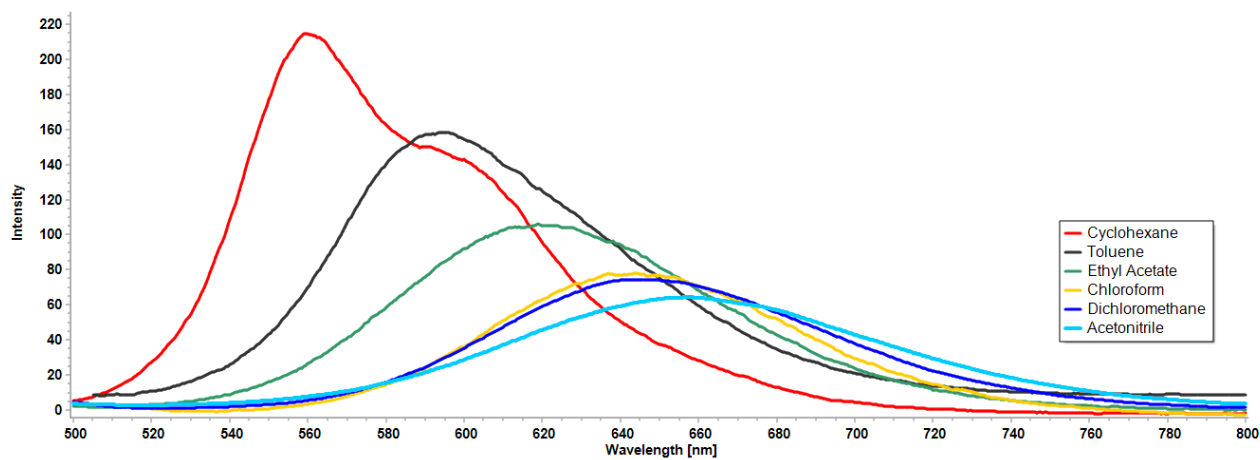

**Figure A25.** Overlapped emission spectra of compound **BT1C** in different solvents.

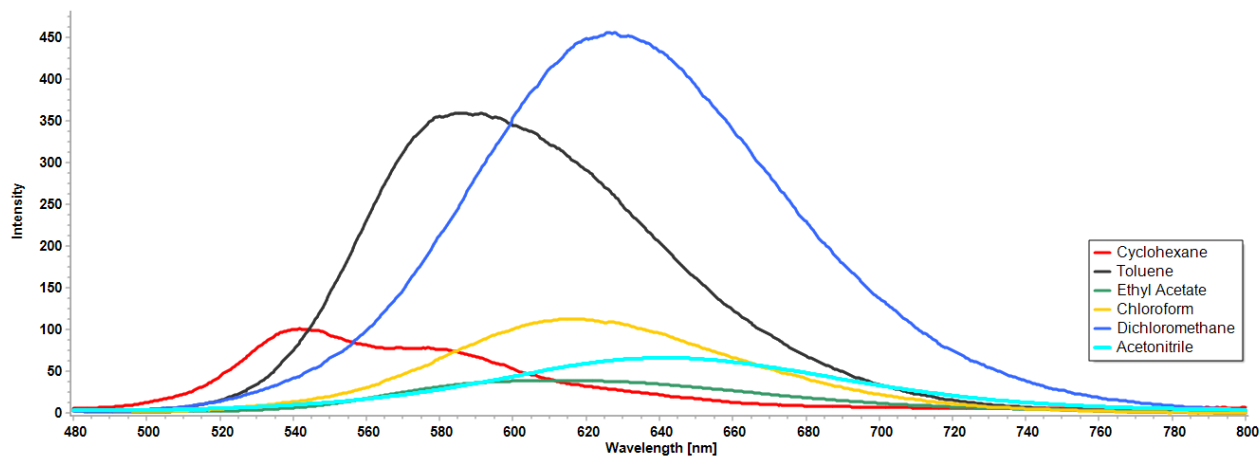

**Figure A26.** Overlapped emission spectra of compound **BT1N** in different solvents.

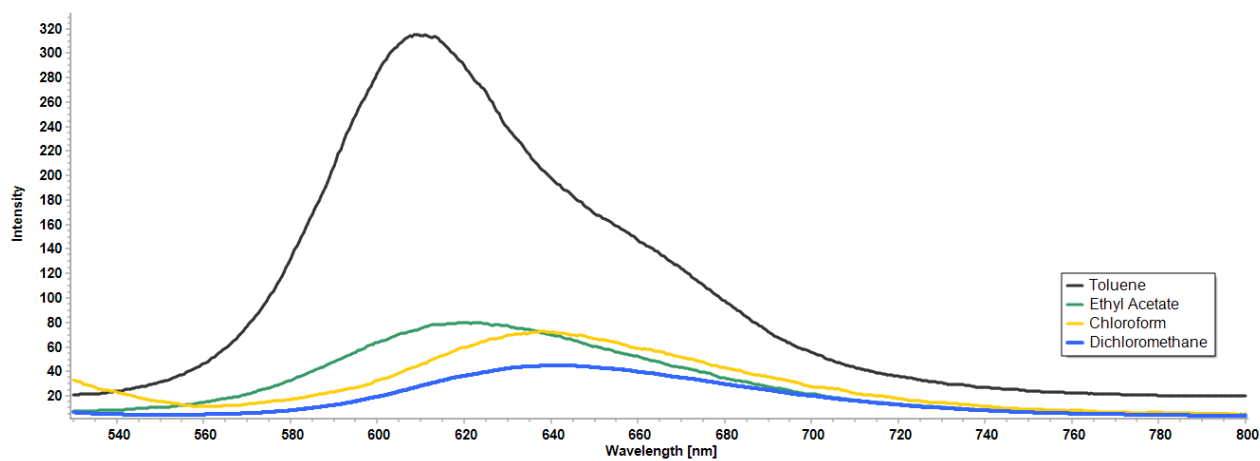

Figure A27. Overlapped emission spectra of compound **BT2C** in different solvents.

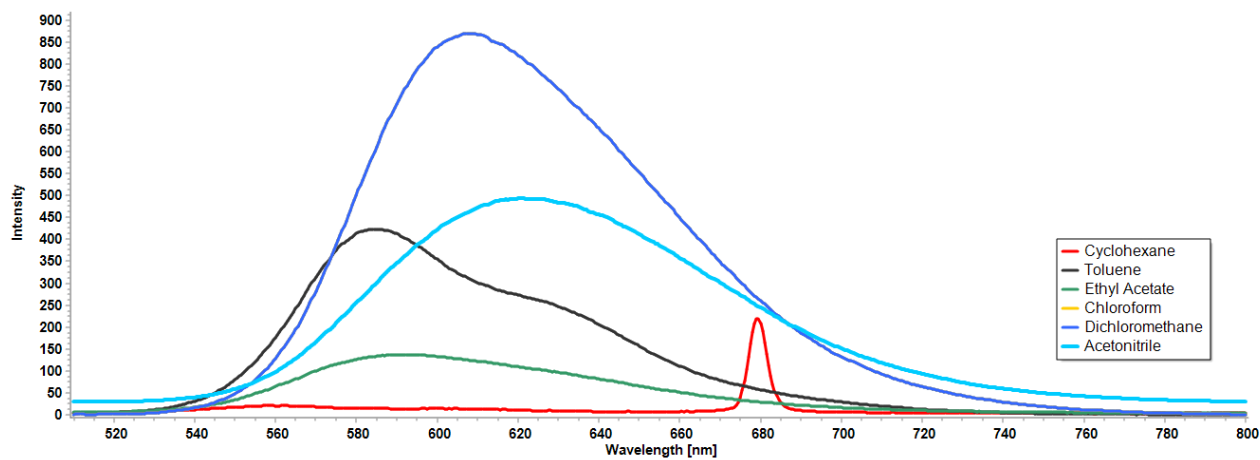

Figure A28. Overlapped emission spectra of compound **BT2N** in different solvents.

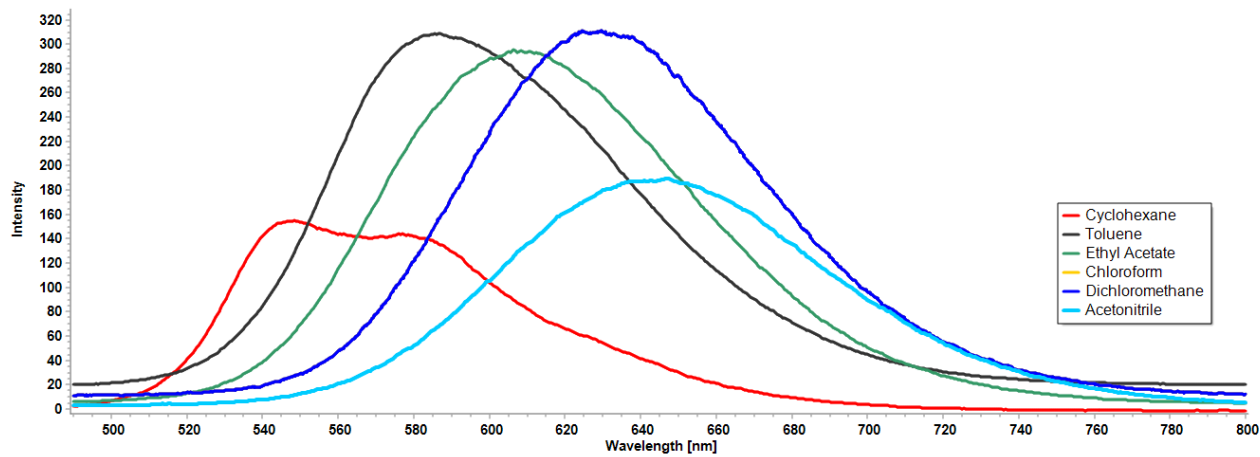

Figure A29. Overlapped emission spectra of compound **BTTN** in different solvents.

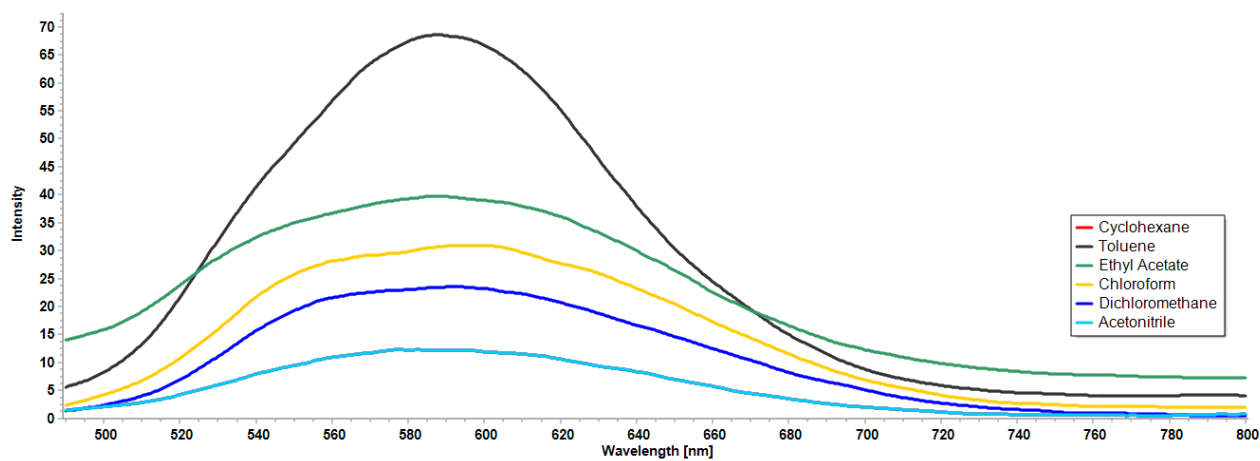

Figure A30. Overlapped emission spectra of compound **BT4N** in different solvents.

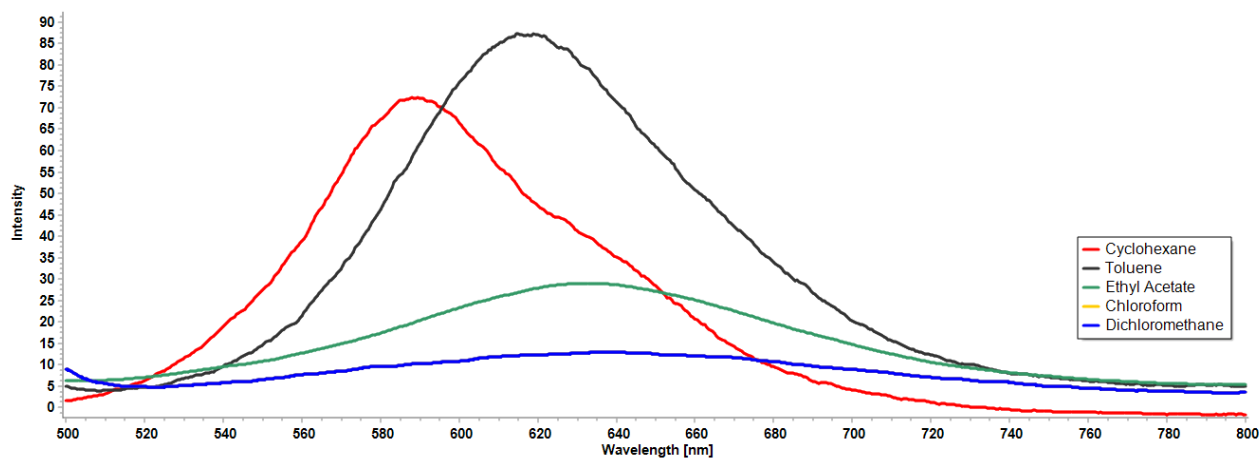

Figure A31. Overlapped emission spectra of compound **BT6N** in different solvents.

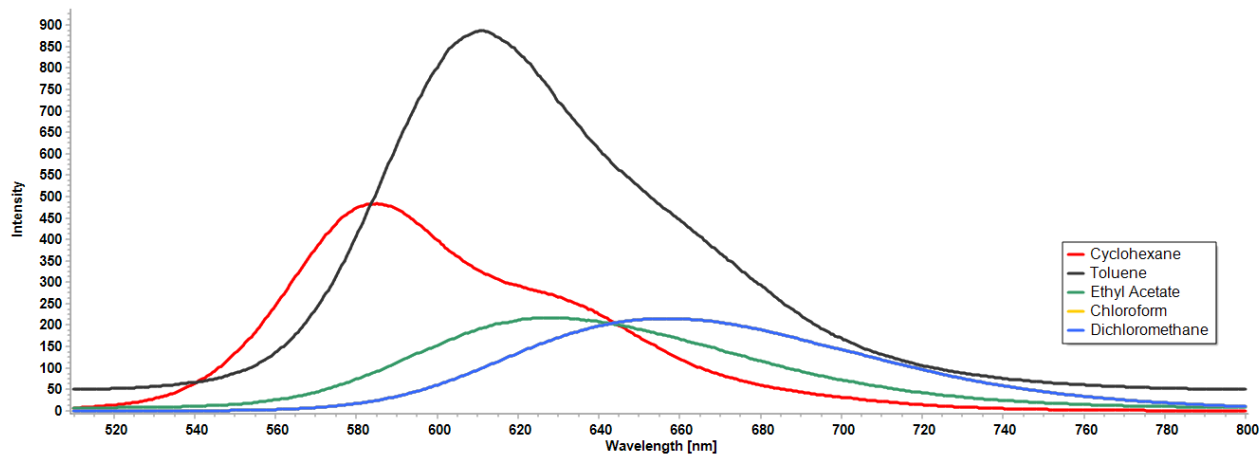

Figure A32. Overlapped emission spectra of compound **D6N** in different solvents.

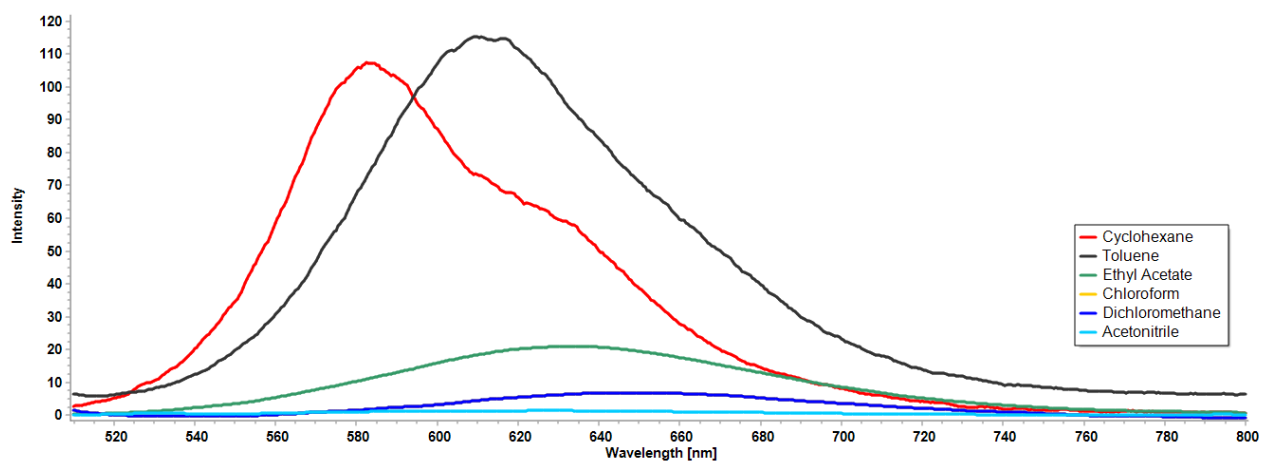

**Figure A33.** Overlapped emission spectra of compound **D8N** in different solvents.

## Plots of $\lambda_{em}$ as a function of $E_T(30)$ for oligothiophenes in different solvents

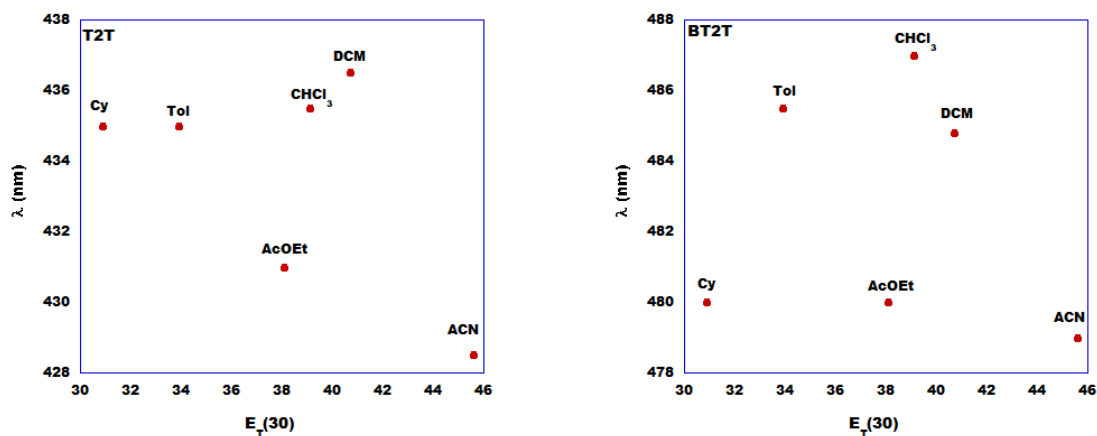

Figure A34. Plots of  $\lambda_{em}$  as a function of  $E_T(30)$  for T2T and BT2T

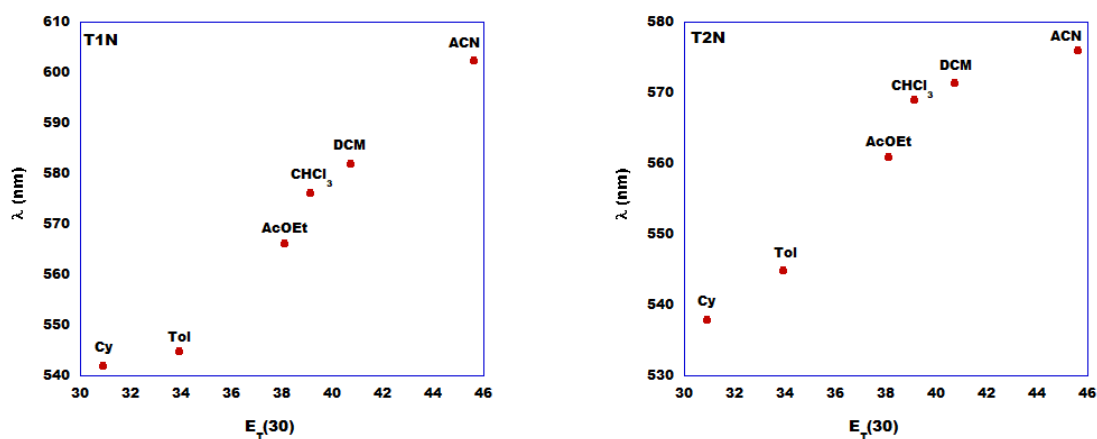

Figure A35. Plots of  $\lambda_{em}$  as a function of  $E_T(30)$  for T1N and T2N

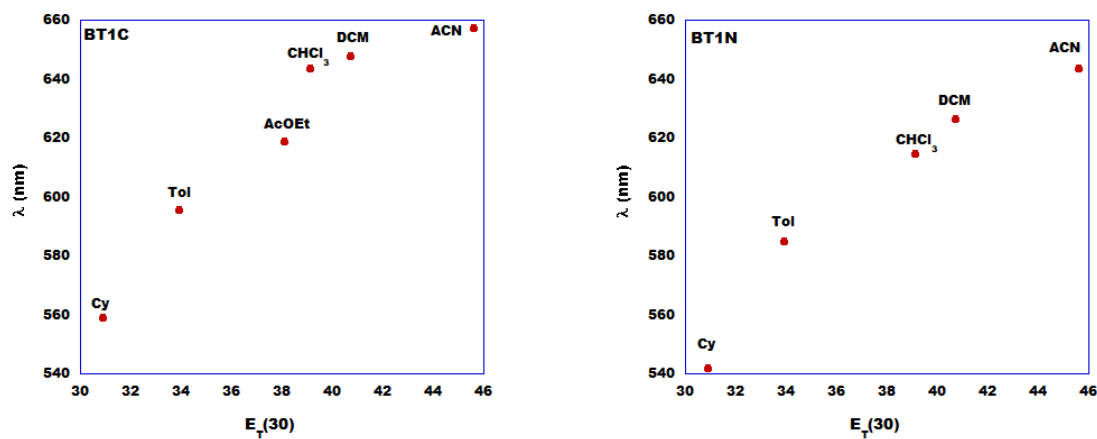

Figure A36. Plots of  $\lambda_{em}$  as a function of  $E_T(30)$  for BT1C and BT1N

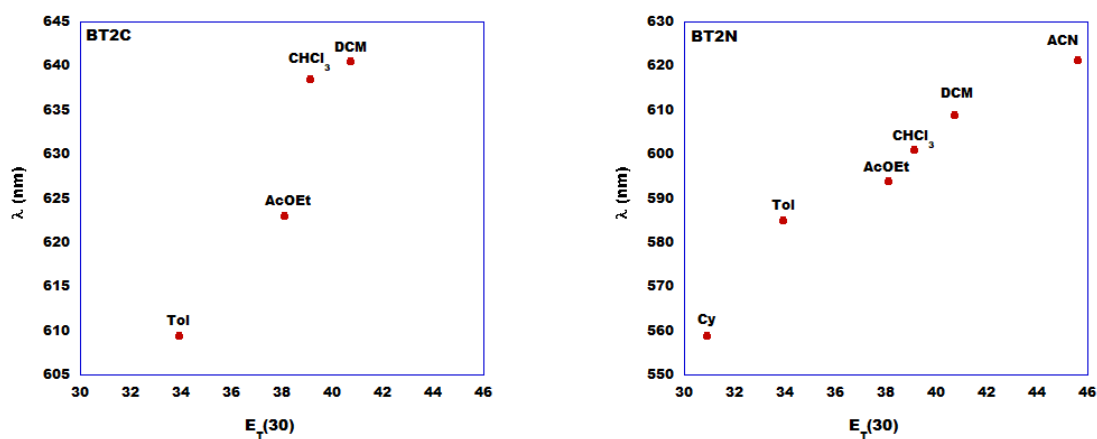

Figure A37. Plots of  $\lambda_{em}$  as a function of  $E_T(30)$  for **BT2C** and **BT2N**

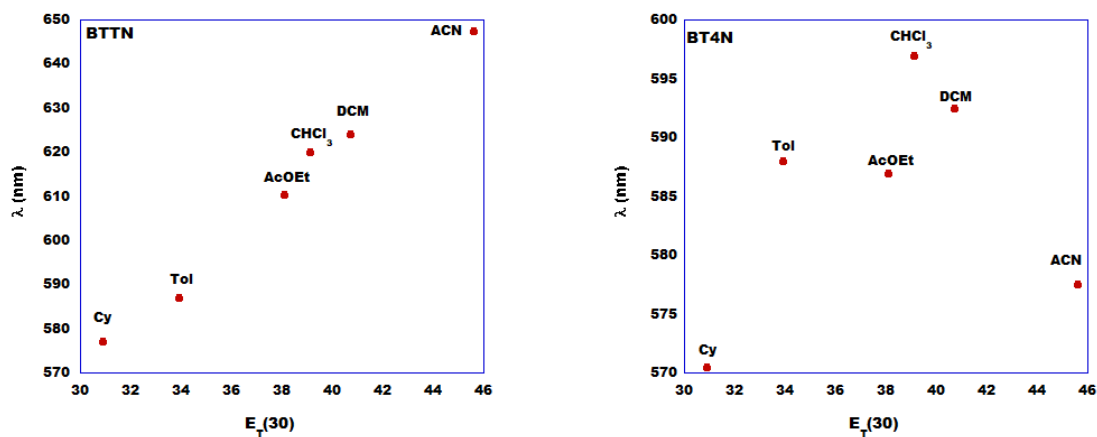

Figure A38. Plots of  $\lambda_{em}$  as a function of  $E_T(30)$  for **BTTN** and **BT4N**

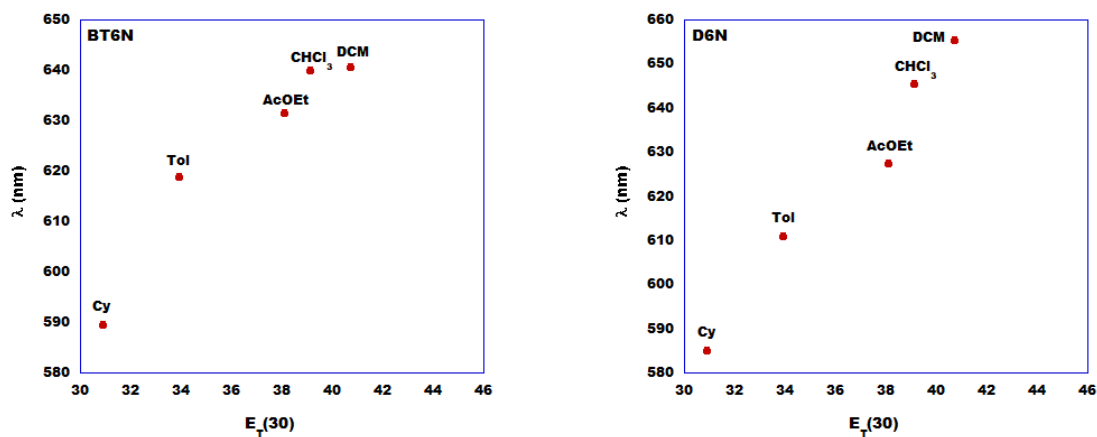

Figure A39. Plots of  $\lambda_{em}$  as a function of  $E_T(30)$  for **BT6N** and **D6N**



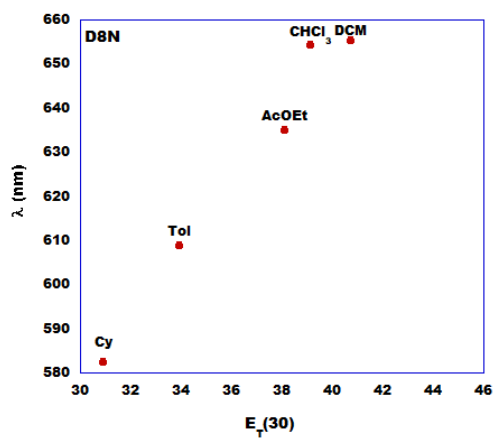

**Figure A40.** Plot of  $\lambda_{em}$  as a function of  $E_T(30)$  for **D8N**

## Lippert-Mataga equation plots for different oligothiophenes

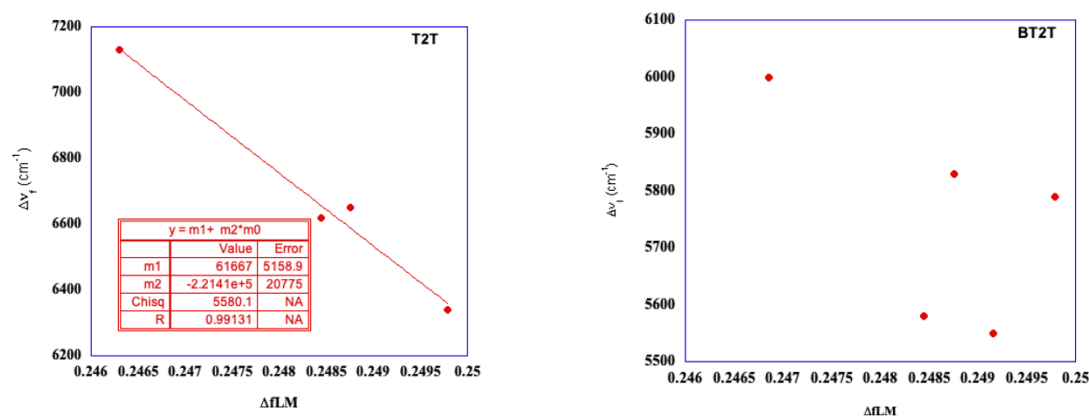

Figure A41. Lippert-Mataga equation plots for T2T and BT2T

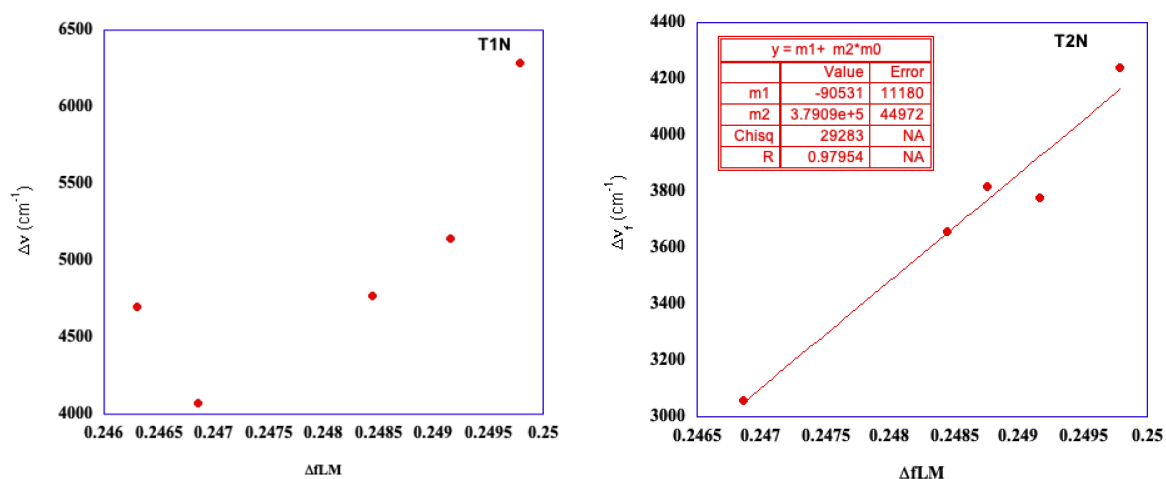

Figure A42. Lippert-Mataga equation plots for T1N and T2N

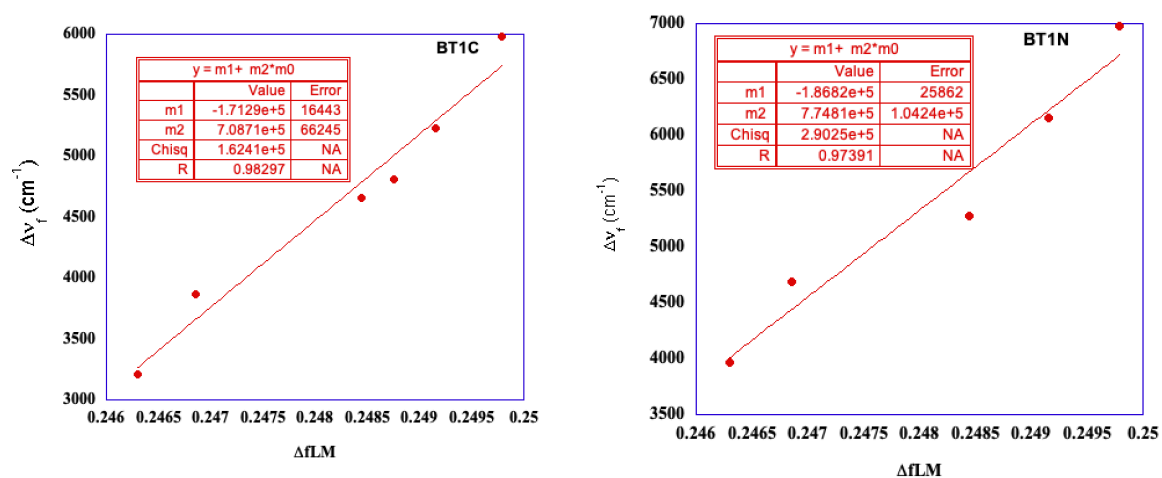

Figure A43. Lippert-Mataga equation plots for BT1C and BT1N

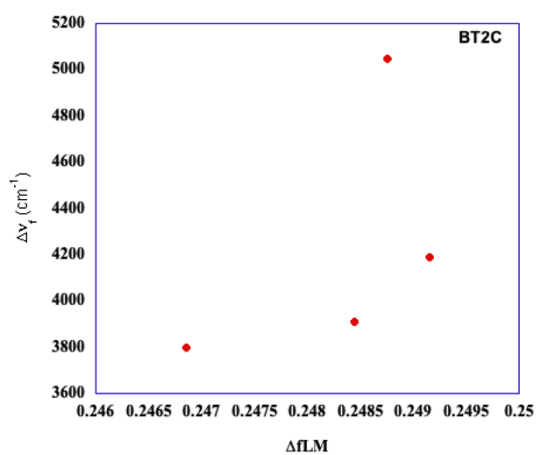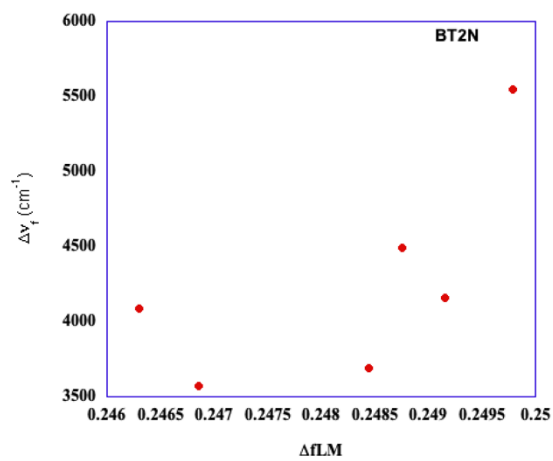

**Figure A44.** Lippert-Mataga equation plots for **BT2C** and **BT2N**

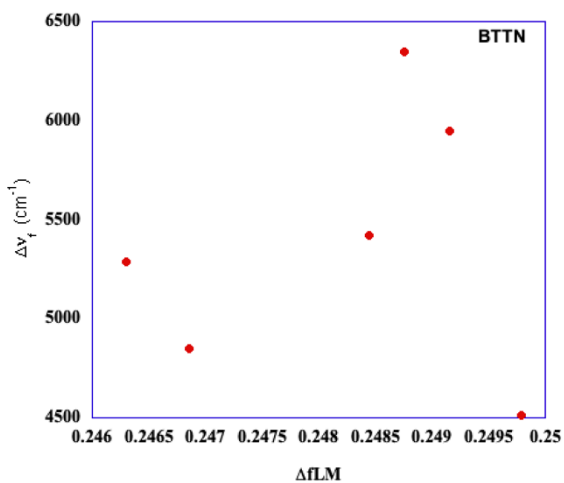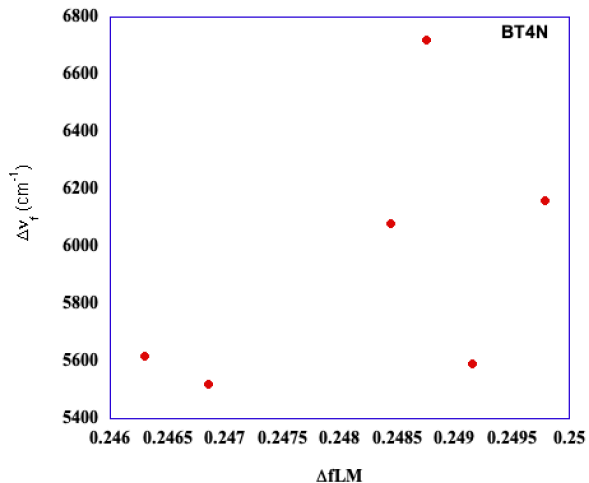

**Figure A45.** Lippert-Mataga equation plots for **BTTN** and **BT4N**

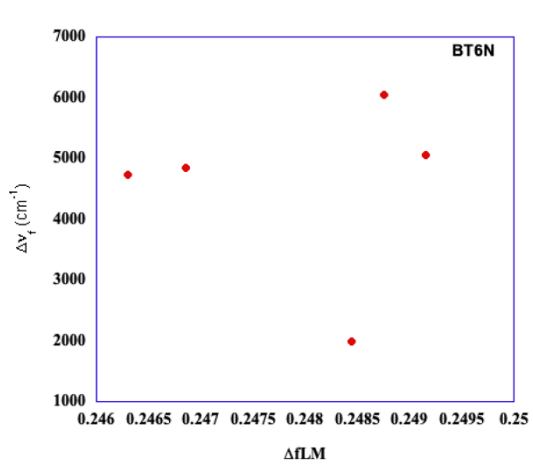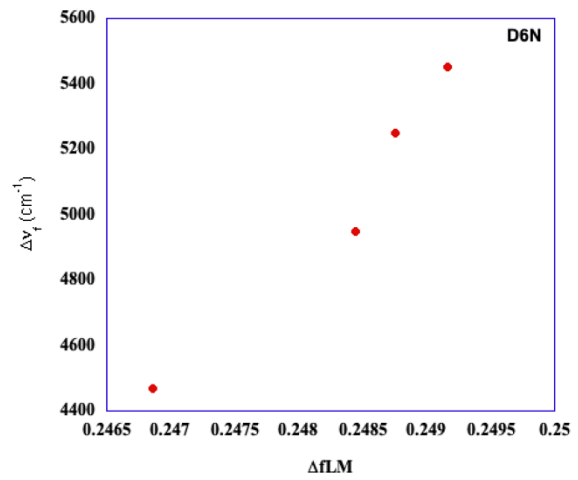

Figure A46. Lippert-Mataga equation plots for **BT6N** and **D6N**

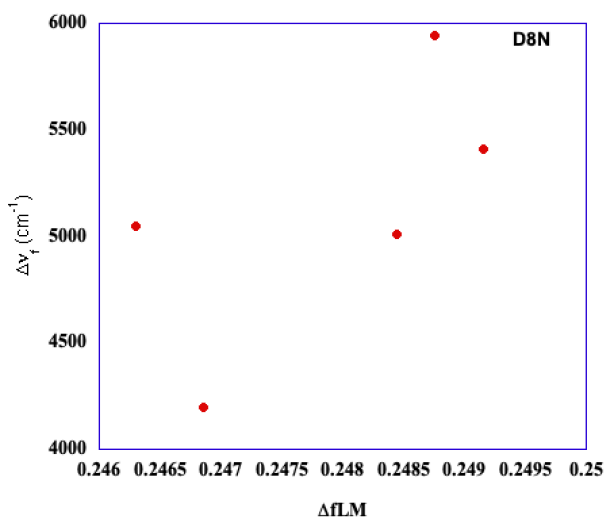

Figure A47. Lippert-Mataga equation plot for **D8N**

**Table A1.** Slopes (*s*) of the linear correlation obtained by the Lippert-Mataga equation

| <b>Compound</b> | <b>s</b>                   |
|-----------------|----------------------------|
| <b>T2T</b>      | $(-220 \pm 20) \cdot 10^3$ |
| <b>BT1C</b>     | $(710 \pm 70) \cdot 10^3$  |
| <b>BT1N</b>     | $(810 \pm 100) \cdot 10^3$ |
| <b>T2N</b>      | $(380 \pm 40) \cdot 10^3$  |
